## PUBLISHER'S NOTE

# Publisher's Note: A necrotic stimulus is required to maximize matrix-mediated myogenesis in mice

Drew Kuraitis, Maria Grazia Berardinelli, Erik J. Suuronen and Antonio Musarò

There is an error in *Dis. Model. Mech.* (2013) **6**, 793-801 (doi:10.1242/dmm.011072).

An issue with cell images in Fig. 4L and M was raised on PubPeer. These two panels show the same cells despite reporting on different experimental conditions. The authors no longer have the original data, so cannot identify and replace the incorrect panel.

The journal is publishing this note to alert readers to the duplication, which does not impact the conclusions of the paper. The authors apologise for any inconvenience caused.
